# Supplementary material
Source: PubMed Central journal article supplement (PMC1297668)
Supplement: pnas_0506599102_1.pdf [file pnas_0506599102_1.pdf]

Stress signal?

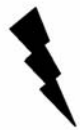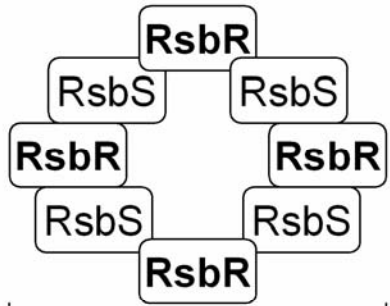

stressosome

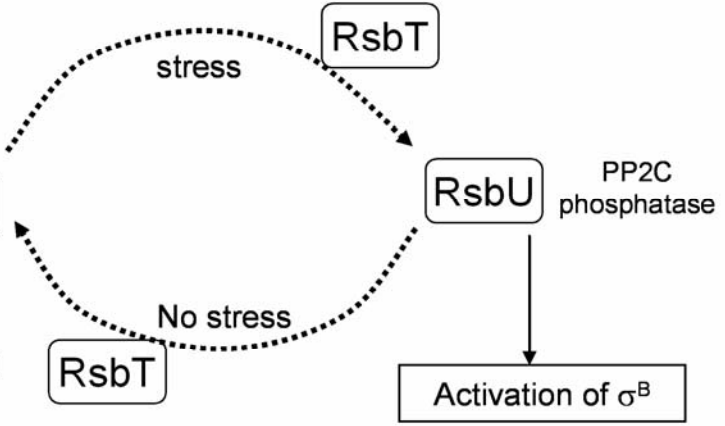

RsbT

stress

RsbU

PP2C phosphatase

No stress

RsbT

Activation of  $\sigma^B$
