# Supplementary material
Source: PubMed Central journal article supplement (PMC1297668)
Supplement: pnas_0506599102_3.pdf [file pnas_0506599102_3.pdf]

A

B

E

F


  
 RsbR\_Bsub MMSNQTVYQFIAENQNELLLQLWDTLKEK-SEQESYQLTDQVYENISKEYIDIL-LLSVKDEN-AAESQISELALRAVQI
   
 RsbR\_Blic -MSNQAVLKFISEHQNVLAGNLADILKDLNSNMTNVKLTEHMYETISNEYIHIL-MNESGDGNEKSIDTIYQFSSKAVQL
   
 RsbR\_Lmon --MYKDFANFIRTNKADLLNNWMNEMEKQSDQLINDIAKEAMYETSKEFVDLI-VSNVTENGSKFNEKLDDFAEKVVHL
   
 RsbR\_Oihe --MKRGFRELLIENS DSIVENWLAEINSLKTGNYTATISDELYESTNREFVNV I-FTSIRNQG--SSKEVEDFSEKIINL
   
 RsbR\_Bhal --MESFIVSFVNEKKDELVKQWSELHQIRSEIYLDKISDDLFLRTSQEFMEHT-FAAIQTSQQEAGERLAPFTERLIQG
   
 YkoB\_Bsub MKLNEKLYAFFSEHVEQMAEEWIETMEE SDPN SLYALHNATVTEELKEQDREFY-RHLNYMYVLPEKQFLEEFQEWVIEL
   
 YojH\_Bsub MAKNKLF EYLSQHAETISSTWYETIEETDPNSIYASTDPVVIHNLKSQN LAFN-YKINRIFIDDEDVYLPILKEWAFEV
   
 YqhA\_Bsub ---MIALDQHLTEHKKDITQOWLEVCTSN GSWLYSAKDQQKLGQKLDQHELLV---TIVAKSLRKEDVEDELNRWSLQC
   
 YetI\_Bsub VNIDQLLYQYIIDNTADITEKWFSLRCQLKGELYSASHLSEETKTLLTEQHTFTNITIASAFLEDQTFQENMTKWAQNV

G

H


  
 RsbR\_Bsub GLSMKFLATALAEFWKRLYTKMNDK----RLPDQESTELIW-----QIDRFFSPINTEIFNQYSISWEKTVSLQKI-----
   
 RsbR\_Blic GVPLKLLSSGLSAFWKHLVYEMNKD----VPEDQQCYDLIW-----EIDKFI EPINSEILNQY AISWEKTVALQ RVAL--
   
 RsbR\_Lmon GWPIHFVTTGLRVFGLLVYTAMRDEDLFLKREEKPEDDAYY-----RFETWLSM YNKVV TAYADTWEKTVSIQK-----
   
 RsbR\_Oihe GWPLSYLTDGLQVFRRVSTEYLLS QS--EVIDSNQFSMILS-----SVDEWVEPLIRQLVNEYSGSWENILSLQRVALQ-
   
 RsbR\_Bhal GWPLIYFTKGLQAFRRTVLAVLAEE-----KDLQQVLKYFY-----EVEEWVDRMVNELVHDYTG SWEDTIEMQKLSLLE
   
 YkoB\_Bsub TNDQKHLDTPVQYVIREFMRNR-----LYTKYFEKFAE-----ENESAFEPGEKQKWADLIVKVDFDTIYTFVDHAE
   
 YojH\_Bsub TQDQEH LKTP IHYI IREFVRVD-----LYVS YVKEFVH-----LNQNTVKSEEAEDLYHALIKAFDLVIHIFIEEMY
   
 YqhA\_Bsub ARDRAVHEVTVTQSF GQFN TFRHIMFEWIHKFSEASSQDISIQEFYEW SRILNQN IDEIIEVFTEEYHQVTMIQLN----
   
 YetI\_Bsub AKNRVEQDVQVHEVVEAISNSRISFWDAVATFIKENQEIVT NEDADRWN RIVNQSFDKLIEFSEQYQKFMLMRLTSQQE
