# Supplementary material
Source: PubMed Central journal article supplement (PMC1297668)

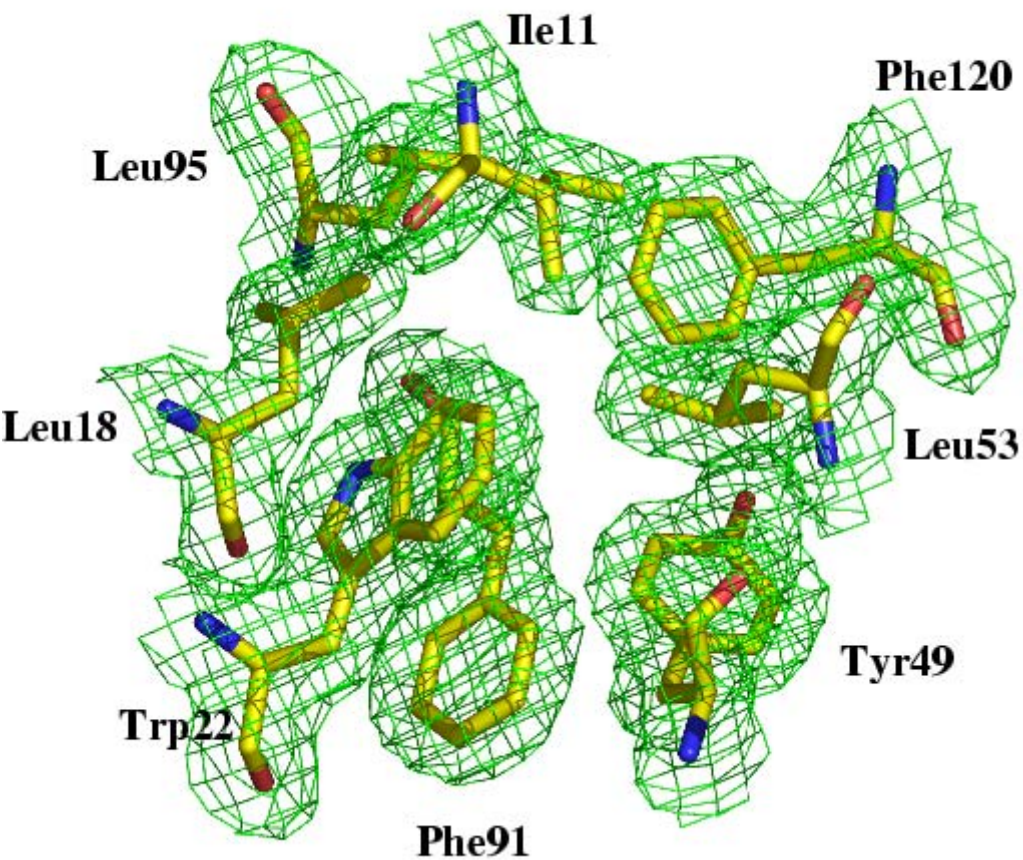

Supplement: pnas_0506599102_2.pdf [file pnas_0506599102_2.pdf]

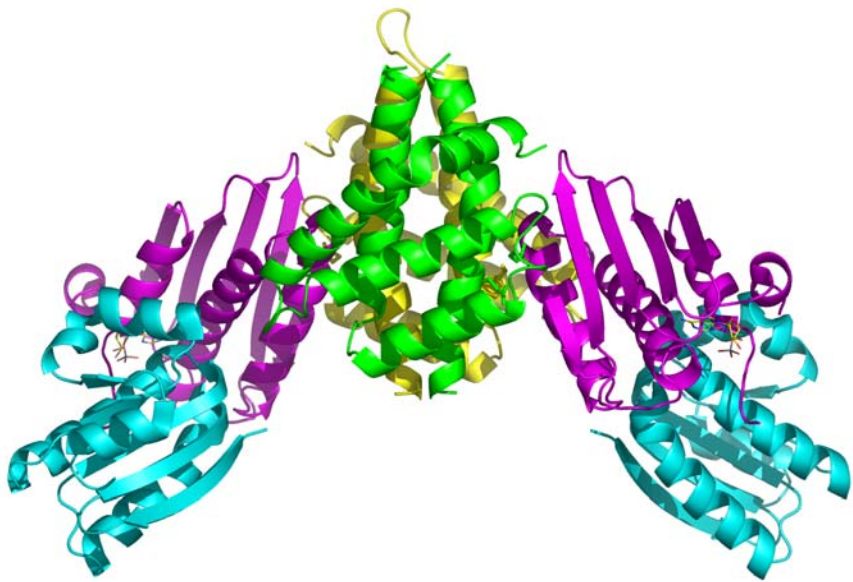

Supplement: pnas_0506599102_4.pdf [file pnas_0506599102_4.pdf]
